# Supplementary material
Source: PubMed Central journal article supplement (PMC3289290)
Supplement: 1118455109_pnas.1118455109_SI.pdf [file 1118455109_pnas.1118455109_SI.pdf]

# Supporting Information

Pang et al. 10.1073/pnas.1118455109

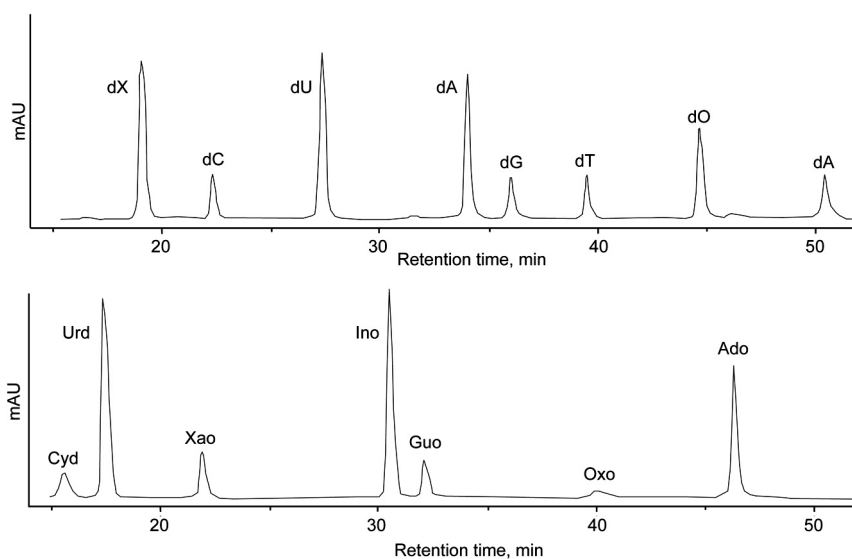

**Fig. S1.** Resolution of canonical and deaminated ribonucleosides by reversed-phase HPLC. The chromatogram was generated with a mixture of standards, as described in detail in *Materials and Methods*.
